# Supplementary material for: A multinuclear NMR study of the restricted rotation in a bi-imidazole nucleoside †
Source: Royal Society of Chemistry journal article supplement (doi:10.1039/b010182f), 2001-01-01

# HMBC correlations in **1** and **2**

$^1\text{H}\{^{13}\text{C}\}$  (solid line) and  $^1\text{H}\{^{15}\text{N}\}$  (dashed line)

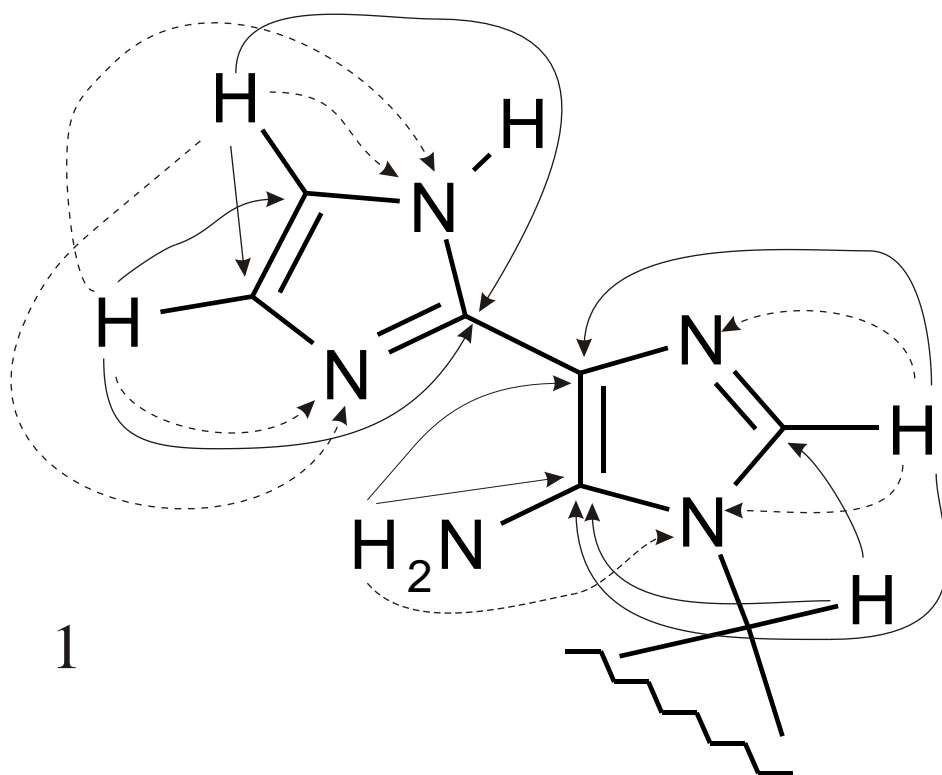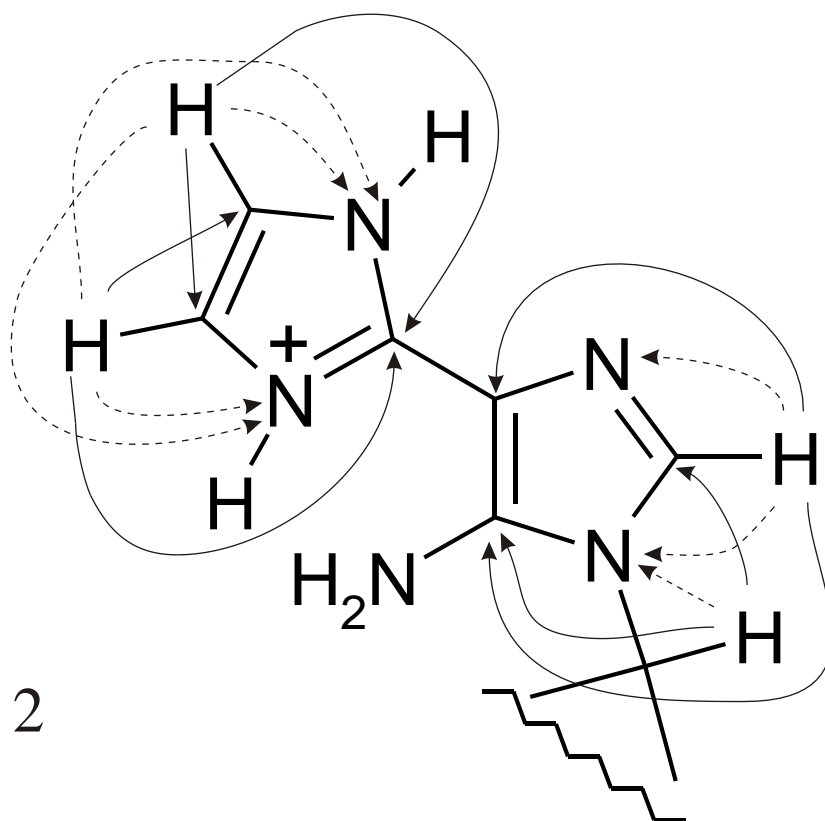

The  $^{15}\text{N}$  HMBC spectrum of the neutral form **1**

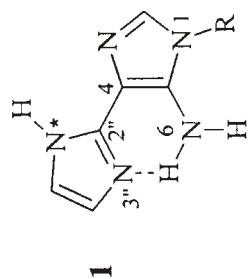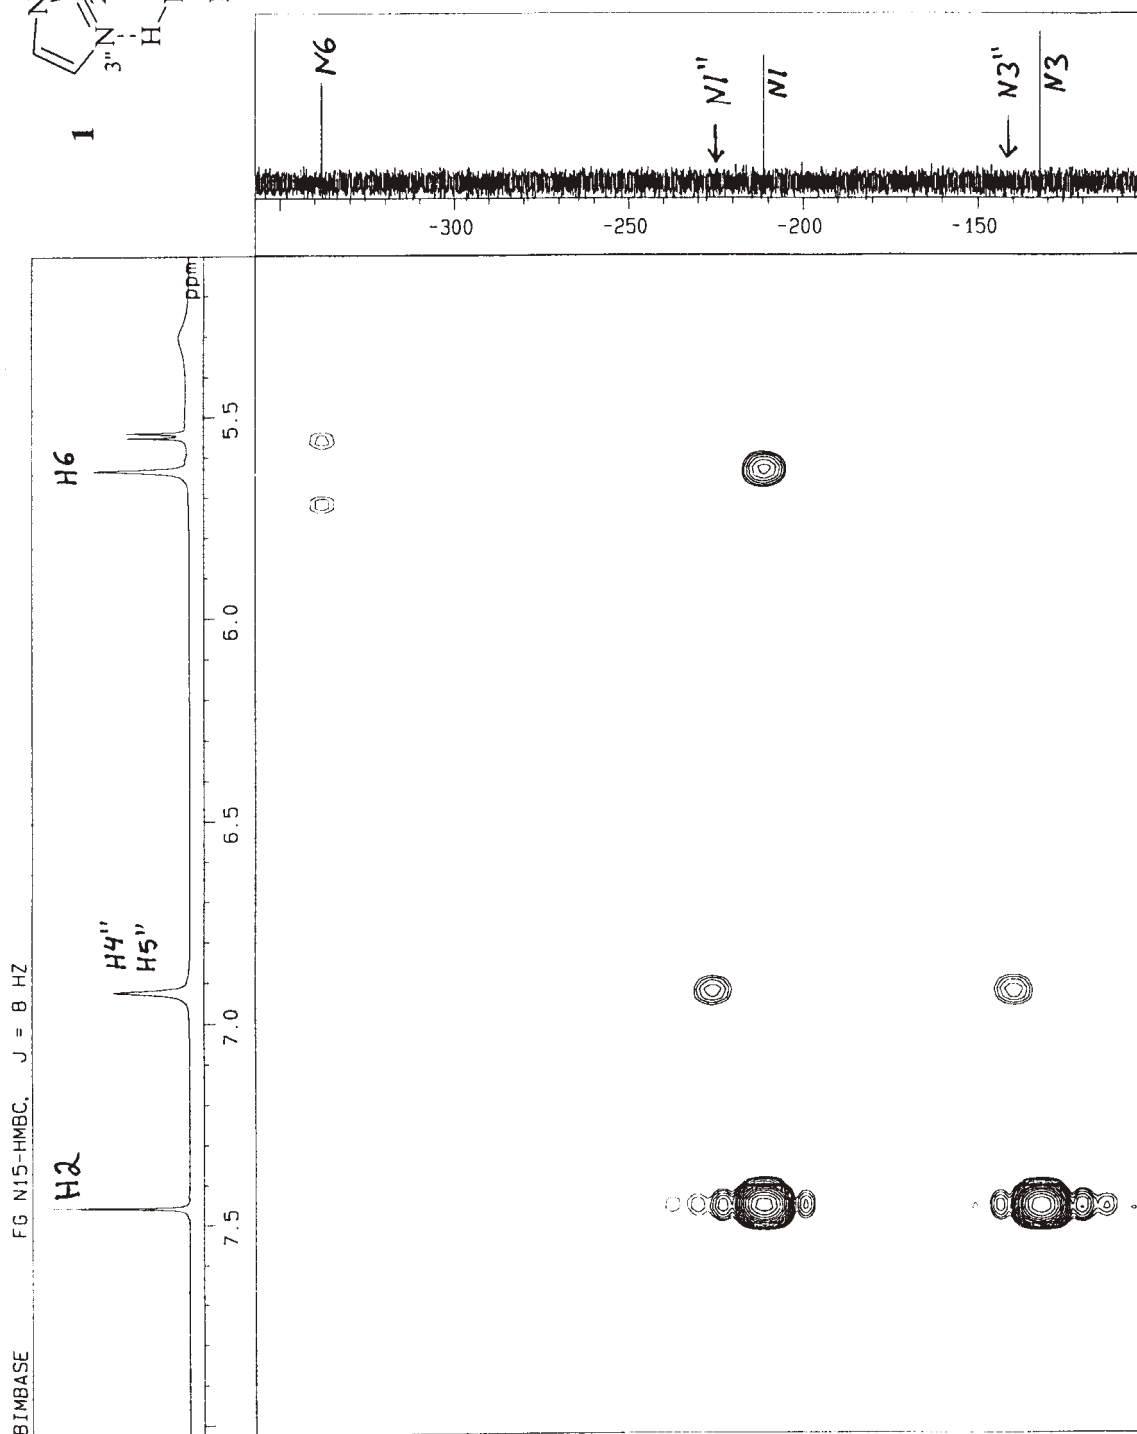

The  $^{15}\text{N}$  HMBC spectrum of the protonated form **2**

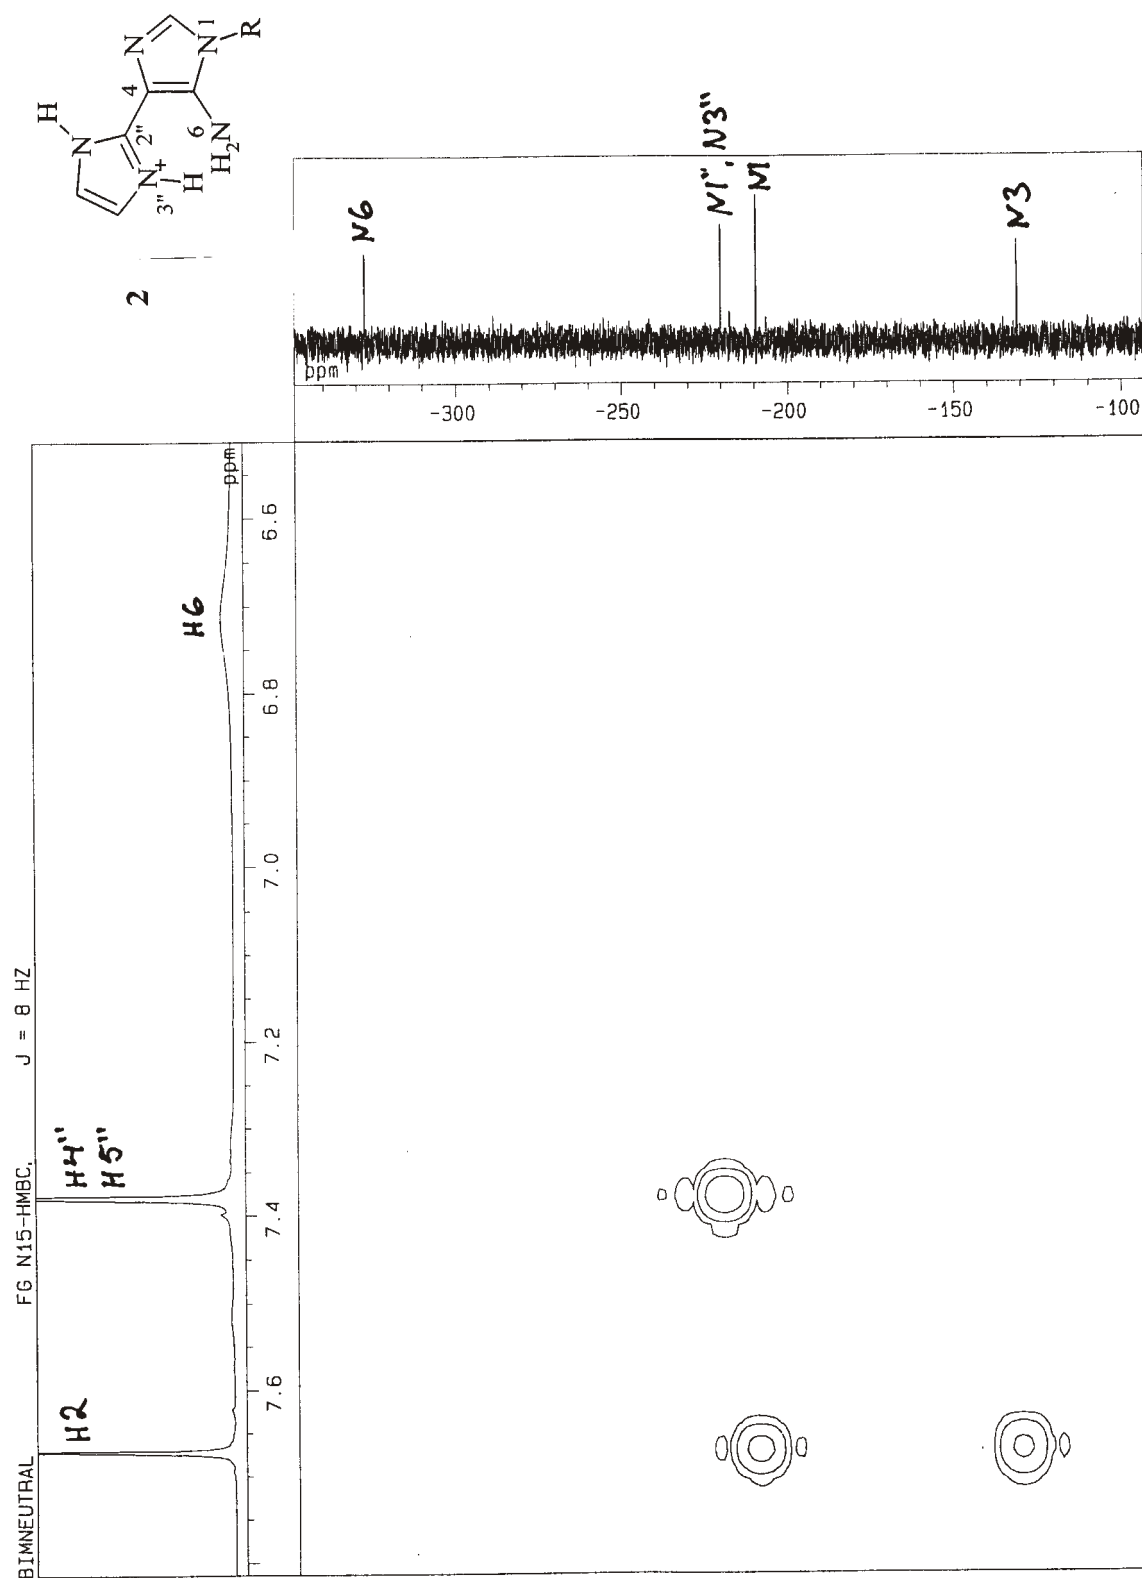

Supplement: b010182f.pdf [file b010182f.pdf]
